# Supplementary material for: The Inhibition Effect and Mechanism of Staurosporine Isolated from Streptomyces sp. SNC087 Strain on Nasal Polyp
Source: MDPI journal article supplement (doi:10.3390/md22010039), 2024-01-11

*Supporting Information*

## **The Inhibition Effect and Mechanism of Staurosporine Isolated from *Streptomyces* sp. SNC087 Strain on Nasal Polyp**

**Grace Choi <sup>1,\*</sup>, Eun-Young Lee <sup>2</sup>, Dawoon Chung <sup>1</sup>, Kichul Choi <sup>1</sup>, Woon-Jong Yu <sup>1</sup>, Sang-Jip Nam <sup>2</sup>, Seong-Kook Park <sup>3</sup> and Il-Whan Choi <sup>4,\*</sup>**

<sup>1</sup> Department of Microbial Resources, National Marine Biodiversity Institute of Korea, Seocheon, 33662, Republic of Korea

<sup>2</sup> Department of Chemistry and Nanoscience, Ewha Womans University, Seoul, 03760, Republic of Korea

<sup>3</sup> Department of Otorhinolaryngology-Head & Neck Surgery, Busan Paik Hospital, Inje University College of Medicine, Busan 47392, Republic of Korea

<sup>4</sup> Department of Microbiology and Immunology, Inje University College of Medicine, Busan 47392, Republic of Korea

\* Correspondence: gchoi@mabik.re.kr, cihima@inje.ac.kr

## Table of Contents

|                                                                                                        |    |
|--------------------------------------------------------------------------------------------------------|----|
| Figure S1 $^1\text{H}$ NMR spectrum (400 MHz, $\text{CDCl}_3$ ) of Staurosporine ( <b>1</b> ) .....    | S3 |
| Figure S2 $^{13}\text{C}$ NMR spectrum (100 MHz, $\text{CDCl}_3$ ) of Staurosporine ( <b>1</b> ) ..... | S4 |

**Figure S1**  $^1\text{H}$  NMR spectrum (400 MHz,  $\text{CDCl}_3$ ) of Staurosporine (**1**)

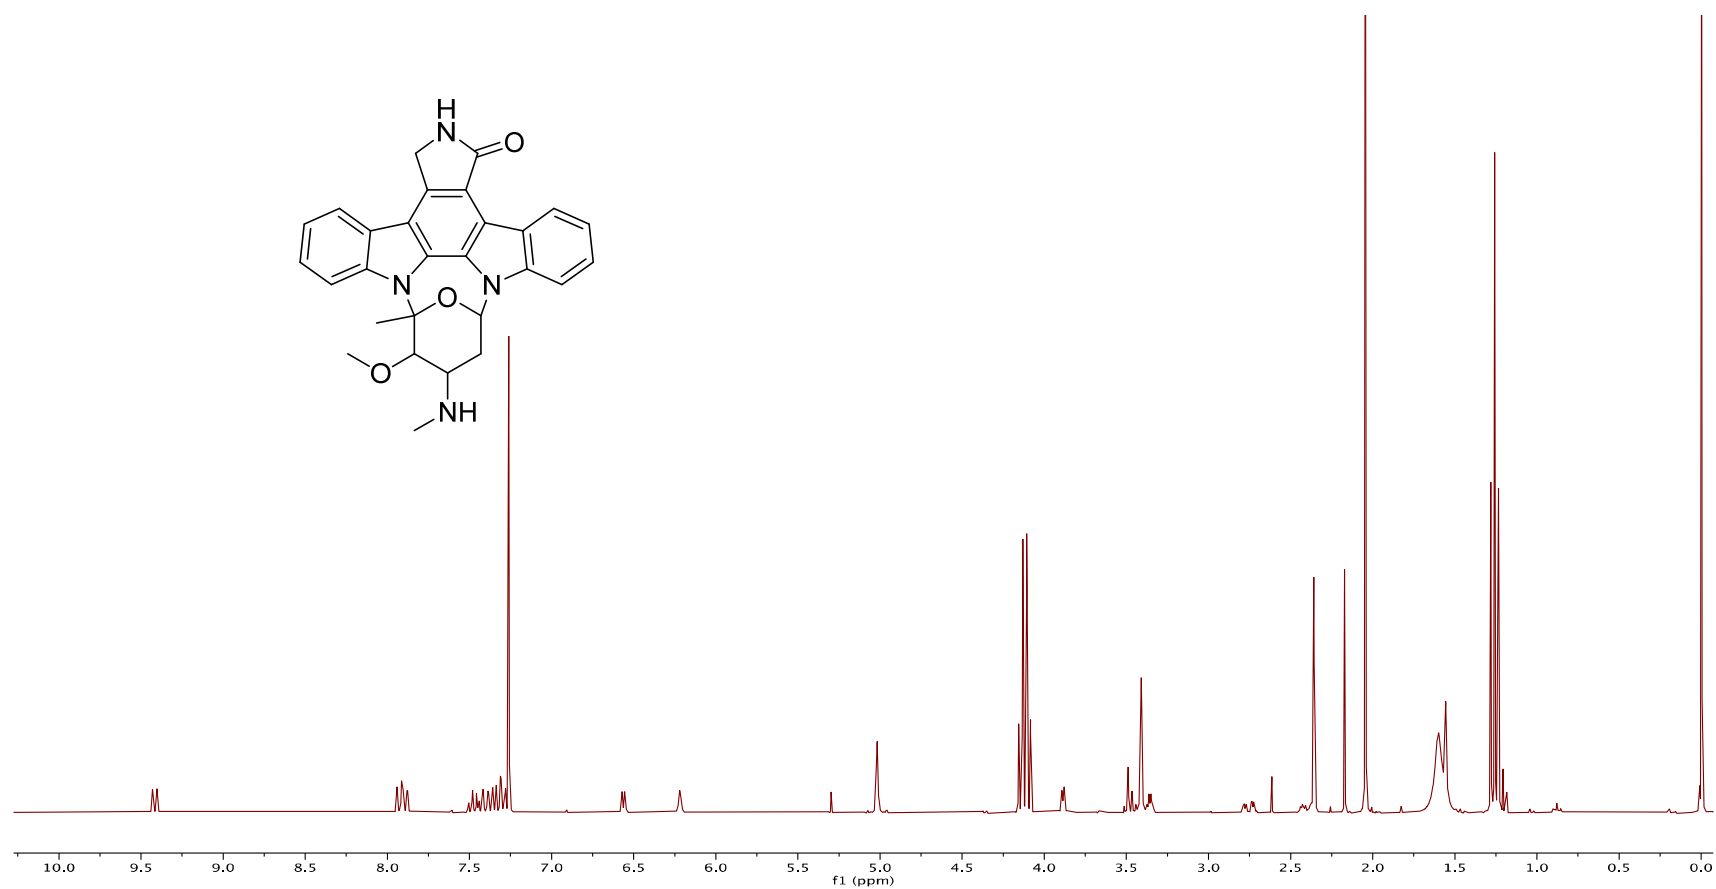

**Figure S2**  $^{13}\text{C}$  NMR spectrum (100 MHz,  $\text{CDCl}_3$ ) of Staurosporine (**1**)

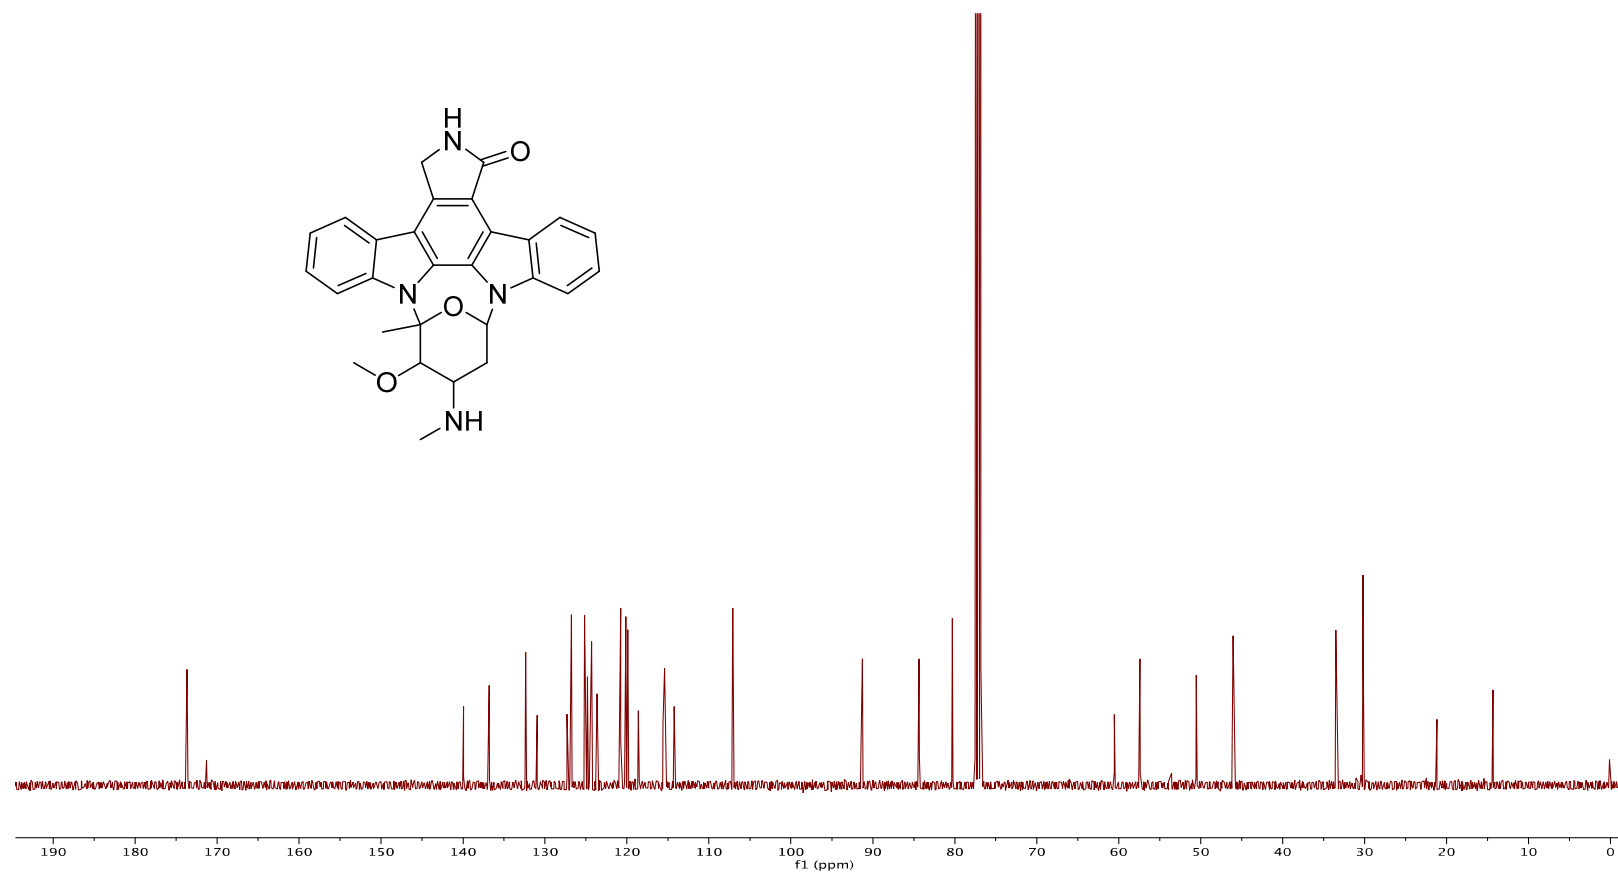

Supplement: s1 [file s1]
